# Supplementary material for: Comparative genomics reveals molecular features unique to the songbird lineage
Source: BMC Genomics. 2014 Dec 13;15(1):1082. doi: 10.1186/1471-2164-15-1082 (PMC4377847; doi:10.1186/1471-2164-15-1082)

**Figure S1:** schematic alignment of brain-derived cDNAs with specific CASC1 duplicate loci

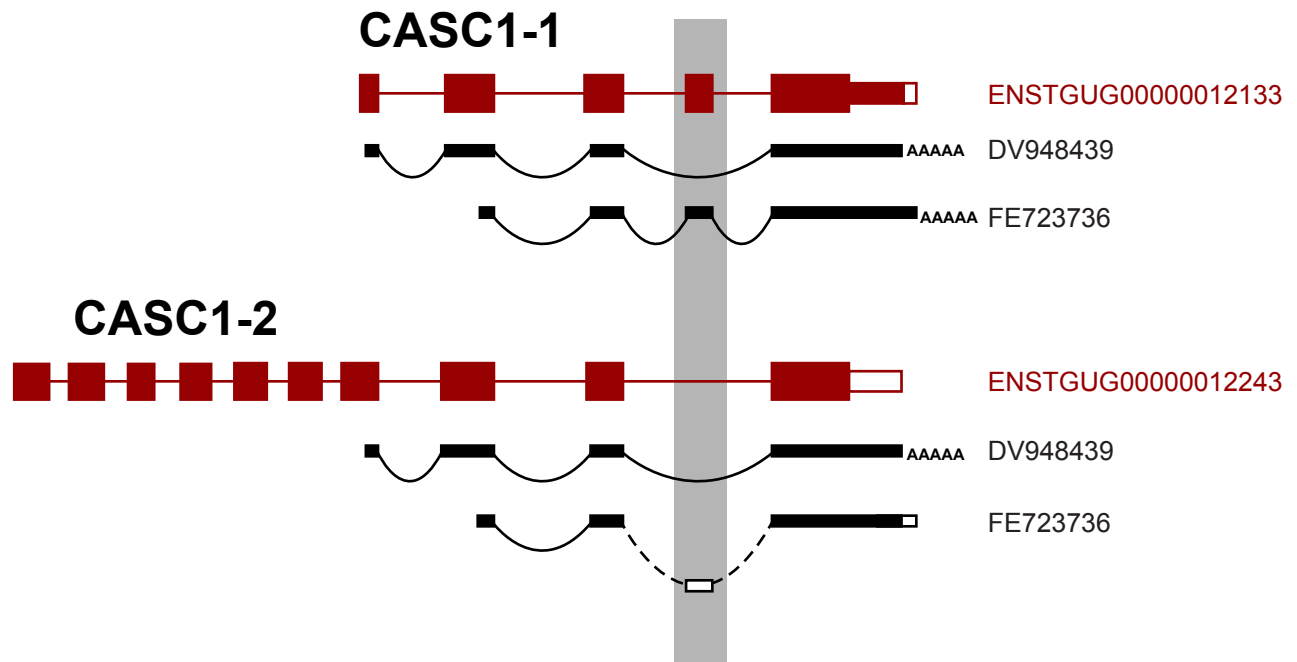

**Figure S2:** percent identity and schematic alignment of brain-derived cDNAs with specific YTHDC2 expanded loci

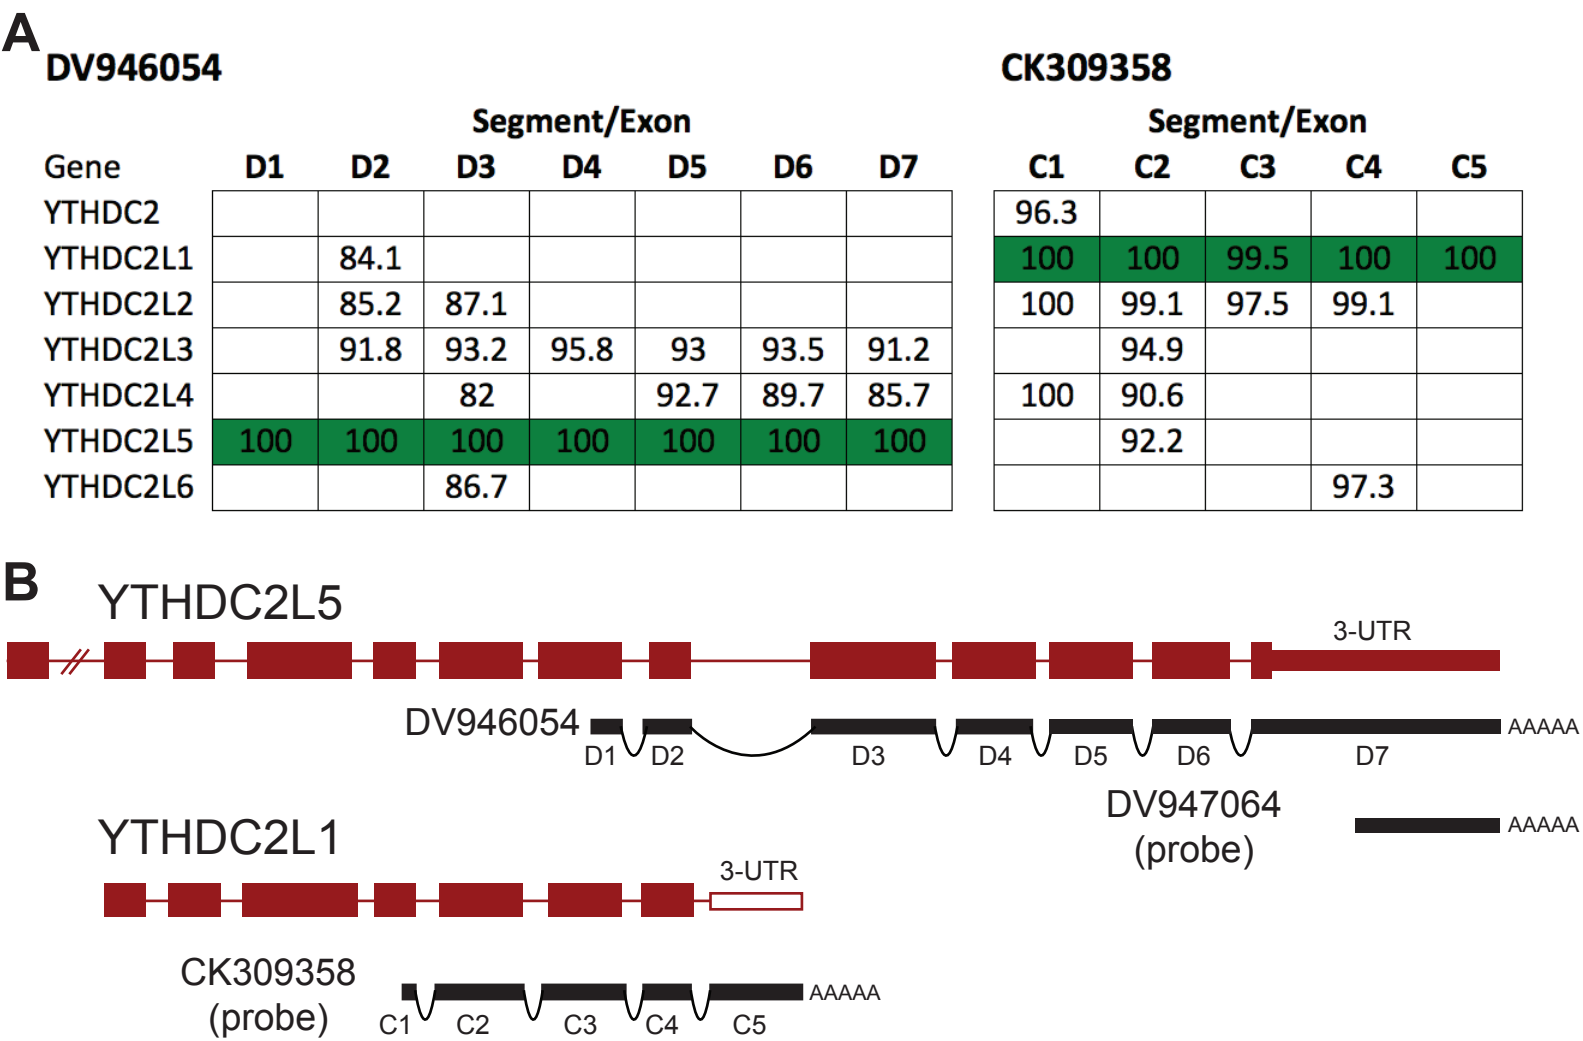

**Figure S3A:** example of an Ensembl gene prediction which splits a gene across two partial models

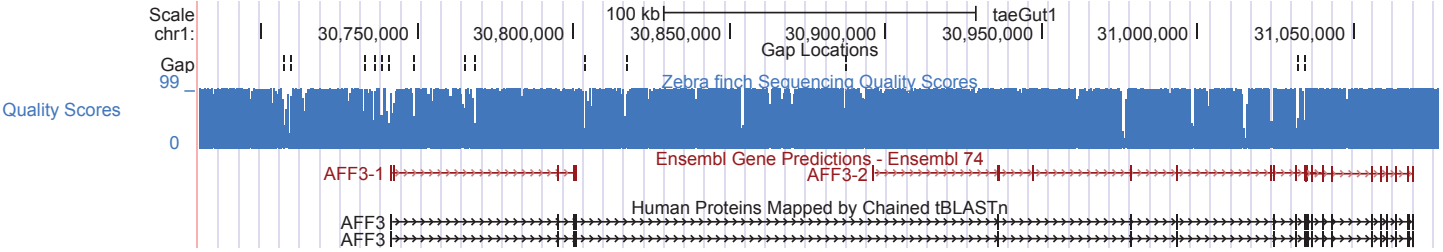

**Figure S3B:** example of a misannotated Ensembl gene prediction

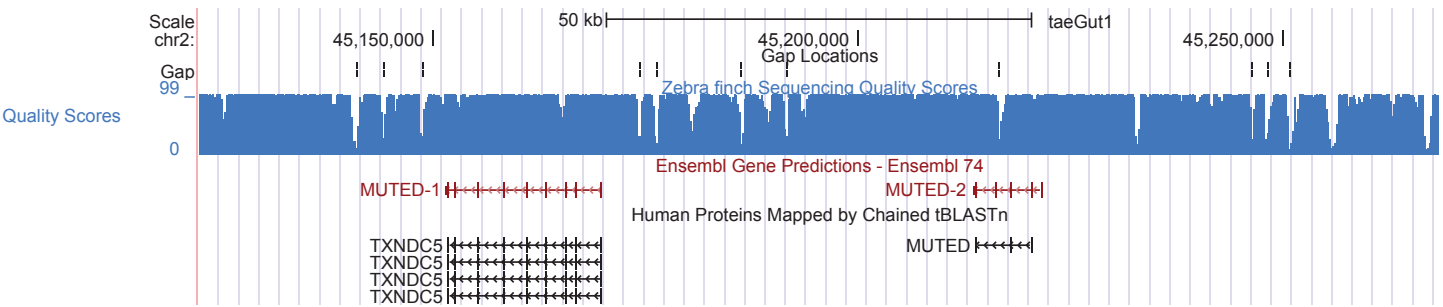

Supplement: Supplementary file 2 — Additional file 2: Figure S1: Schematic alignment of brain-derived cDNAs with specific CASC1 duplicate loci. Figure S2. percent identity (A) and schematic alignment (B) of brain-derived cDNAs with specific YTHDC2 expanded loci. Figure S3. (A) example of an Ensembl gene prediction which splits a gene across two partial models, (B) example of a misannotated Ensembl gene prediction. (PDF 491 KB) [file 12864_2014_6805_MOESM2_ESM.pdf]
